# Supplementary material
Source: PubMed Central journal article supplement (PMC7783592)
Supplement: jamapediatr-e205351-s001.pdf [file jamapediatr-e205351-s001.pdf]

## Supplementary Online Content

Raghuraman N, Temming LA, Doering MM, et al. Maternal oxygen supplementation compared with room air for intrauterine resuscitation: a systematic review and meta-analysis. *JAMA Pediatr*. Published online January 4, 2021.  
doi:10.1001/jamapediatrics.2020.5351

**eTable.** Pooled and Stratified Analyses for the Effect of Oxygen Versus Room Air on Umbilical Artery pH

**eFigure 1.** Funnel Plot: The Effect of Maternal Oxygen Administration Versus Room Air on Umbilical Artery pH

**eFigure 2.** Forest Plot: Effect of Maternal Oxygen Supplementation Versus Room Air on Umbilical Artery pH <7.2

**eFigure 3.** Forest Plot: Effect of Maternal Oxygen Supplementation Versus Room Air on Umbilical Artery pO<sub>2</sub> (mmHg)

**eFigure 4.** Forest Plot: Effect of Maternal Oxygen Supplementation Versus Room Air on Umbilical Artery Base Excess

**eFigure 5.** Forest Plot: Effect of Maternal Oxygen Supplementation Versus Room Air on 1 Minute Apgar Score

**eFigure 6.** Forest Plot: Effect of Maternal Oxygen Supplementation Versus Room Air on 5 Minute Apgar Score

**eFigure 7.** Forest Plot: Effect of Maternal Oxygen Supplementation Versus Room Air on NICU Admission

**eAppendix.** Search Syntax

**eReferences**

This supplementary material has been provided by the authors to give readers additional information about their work.

eTable: Pooled and stratified analyses for the effect of oxygen versus room air on umbilical artery pH

|                                 | Number of studies | Oxygen (n) | Room air (n) | Weighted mean difference (95% CI) | I <sup>2</sup> | P value |
|---------------------------------|-------------------|------------|--------------|-----------------------------------|----------------|---------|
| <b>Scheduled CS</b>             |                   |            |              |                                   |                |         |
| Low risk of bias                | 5                 | 307        | 277          | 0.00 (-0.03, 0.02)                | 48.26          | 0.14    |
| High risk of bias               | 5                 | 303        | 216          | 0.01 (-0.01, 0.02)                | 63.56          | 0.02    |
| High flow O <sub>2</sub> device | 5                 | 248        | 179          | -0.01 (-0.02, 0.00)               | 0.11           | 0.93    |
| Low flow O <sub>2</sub> device  | 5                 | 362        | 314          | 0.00 (-0.02, 0.03)                | 77.26          | 0.01    |
| FiO <sub>2</sub> ≥60            | 2                 | 52         | 32           | 0.00 (-0.04, 0.03)                | 0.01           | 0.77    |
| FiO <sub>2</sub> <60            | 5                 | 302        | 200          | -0.01 (-0.02, 0.00)               | 0.03           | 0.38    |
| <b>Labor</b>                    |                   |            |              |                                   |                |         |
| High quality                    | 4                 | 338        | 349          | -0.02 (-0.04, 0.00)               | 0.20           | 0.60    |
| Low quality                     | 1                 | 57         | 60           | 0.01 (-0.07, 0.09)                | --             | --      |
| High flow O <sub>2</sub> device | 3                 | 135        | 141          | 0.00 (-0.03, 0.03)                | 0.00           | 0.94    |
| Low flow O <sub>2</sub> device  | 2                 | 260        | 268          | -0.02 (-0.05, 0.00)               | 0.13           | 0.41    |
| FiO <sub>2</sub> ≥60            | 3                 | 146        | 155          | -0.02 (-0.05, 0.00)               | 0.03           | 0.59    |
| FiO <sub>2</sub> <60            | 1                 | 30         | 30           | 0.00 (-0.04, 0.04)                | --             | --      |

eFigure 1: Funnel Plot- The effect of maternal oxygen administration versus room air on umbilical artery pH

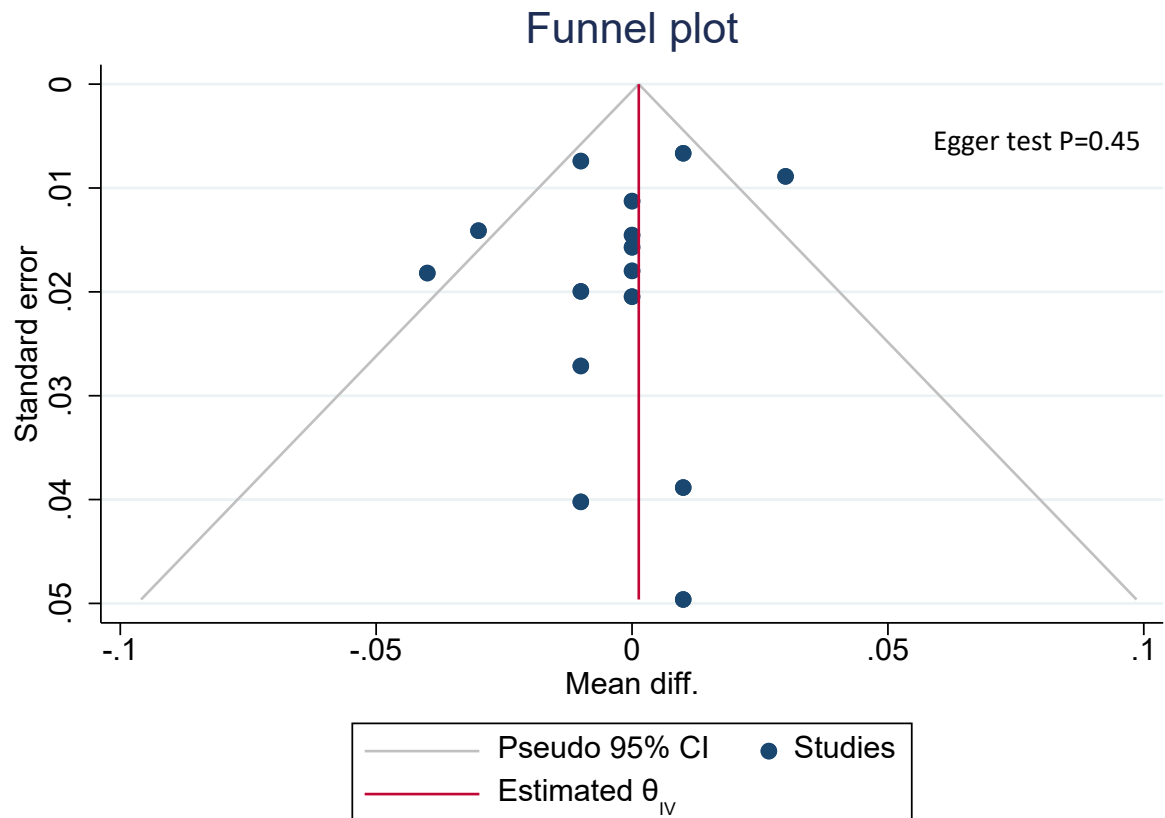

eFigure 2 : Forest plot- Effect of maternal oxygen supplementation versus room air on umbilical artery pH <7.2

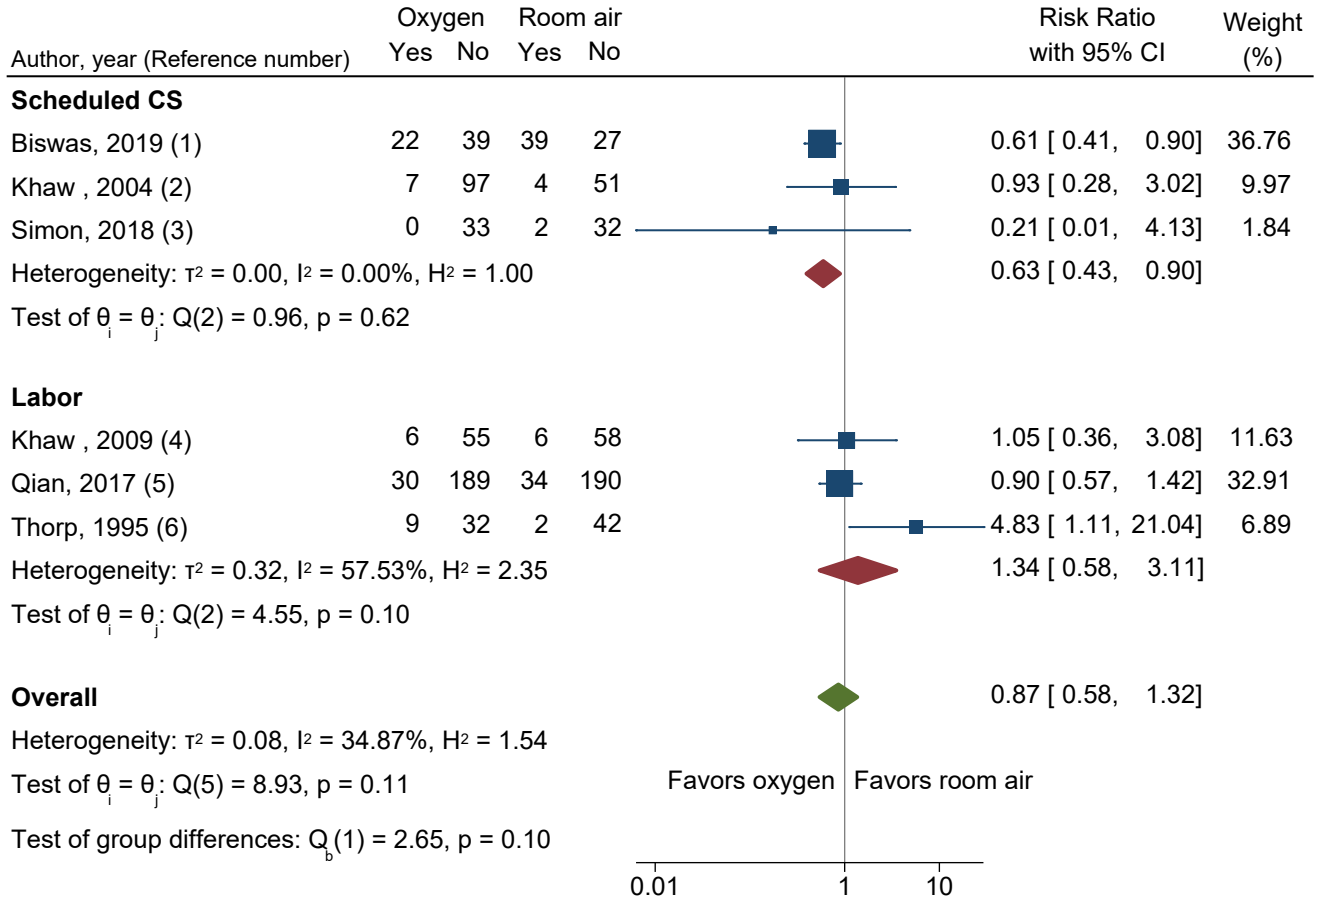

Random-effects REML model

eFigure 3: Forest Plot- Effect of maternal oxygen supplementation versus room air on umbilical artery pO<sub>2</sub> (mmHg)

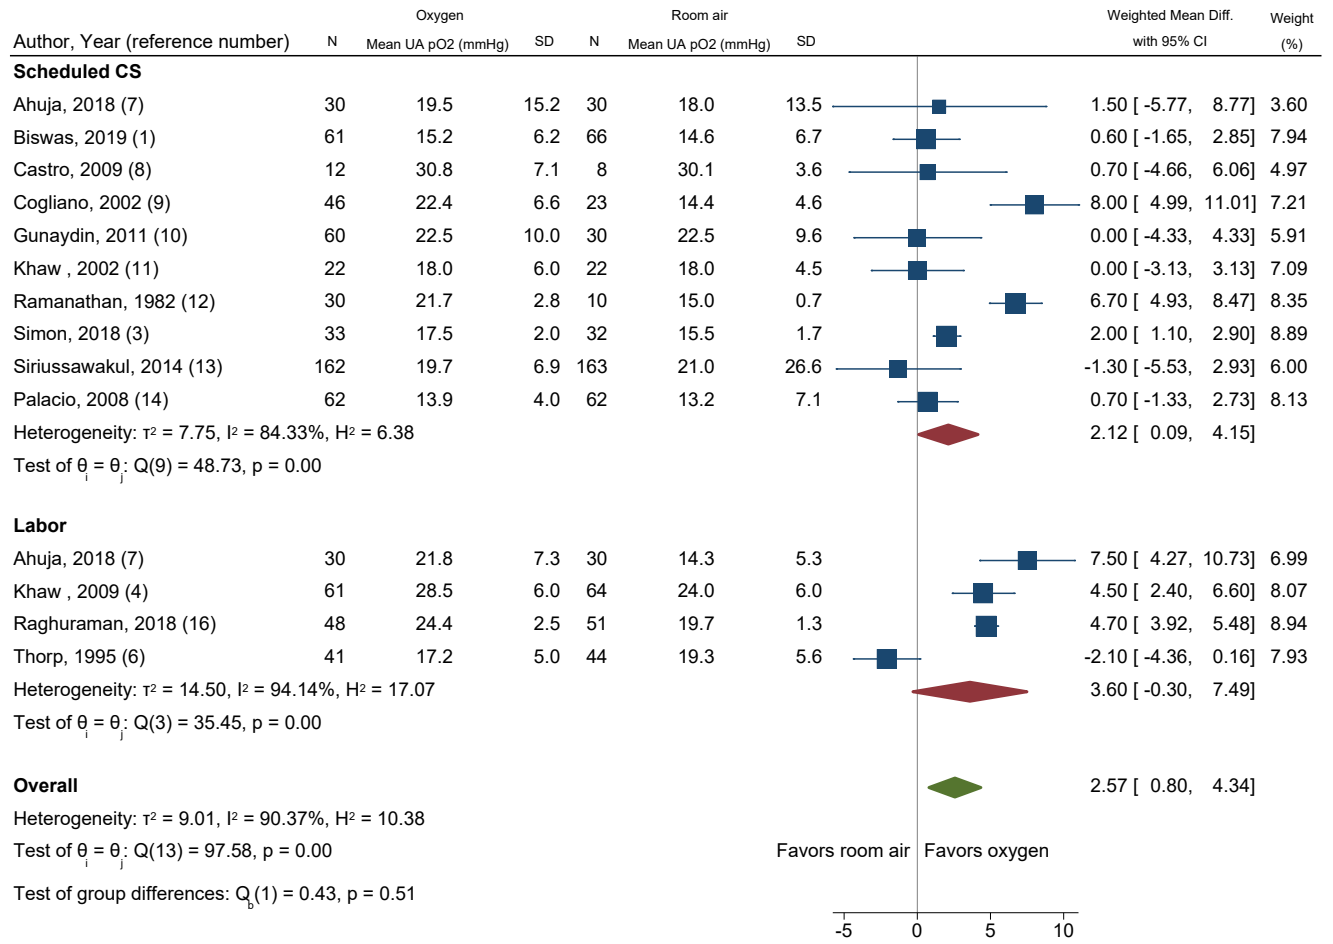

Random-effects REML model

eFigure 4: Forest plot- Effect of maternal oxygen supplementation versus room air on umbilical artery base excess

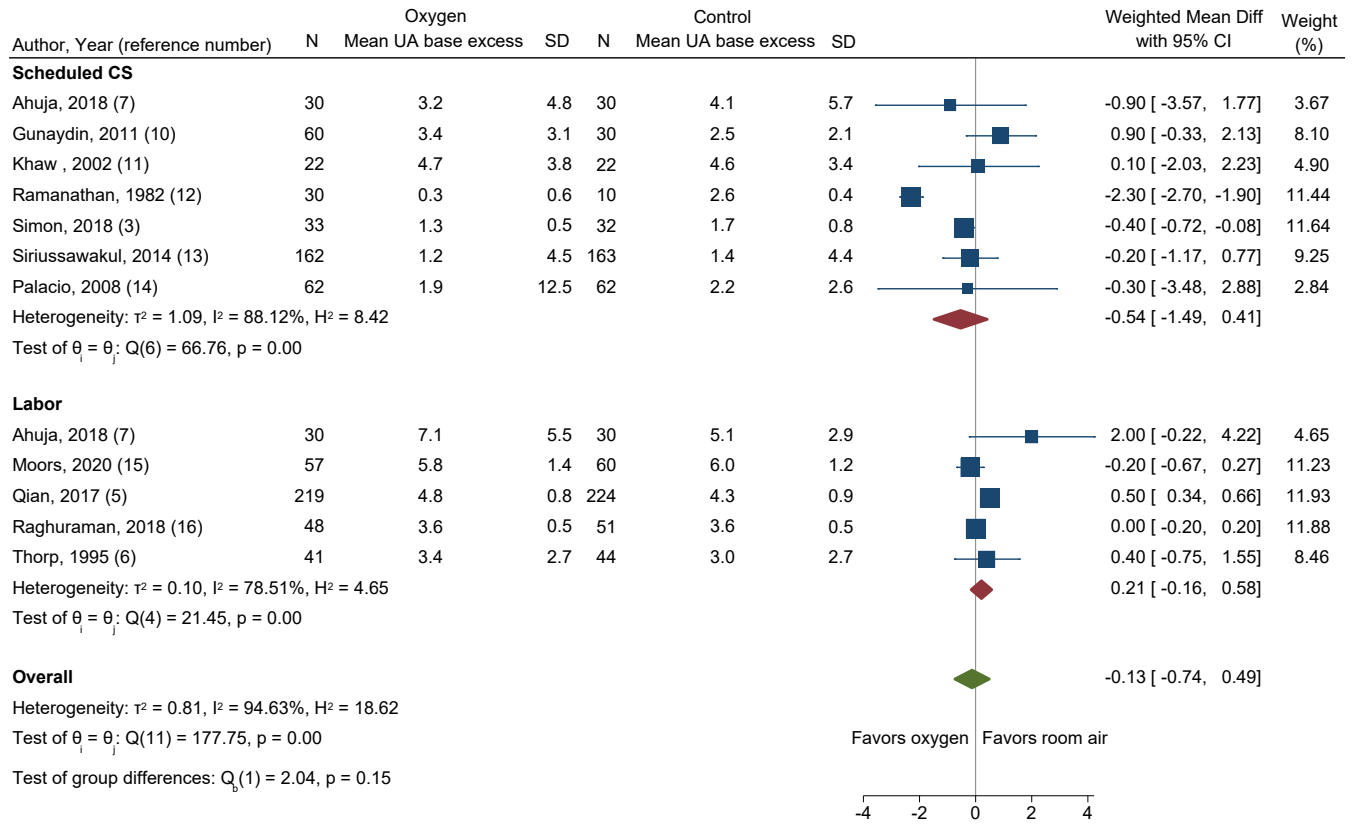

Random-effects REML model

eFigure 5: Forest Plot- Effect of maternal oxygen supplementation versus room air on 1 minute Apgar score

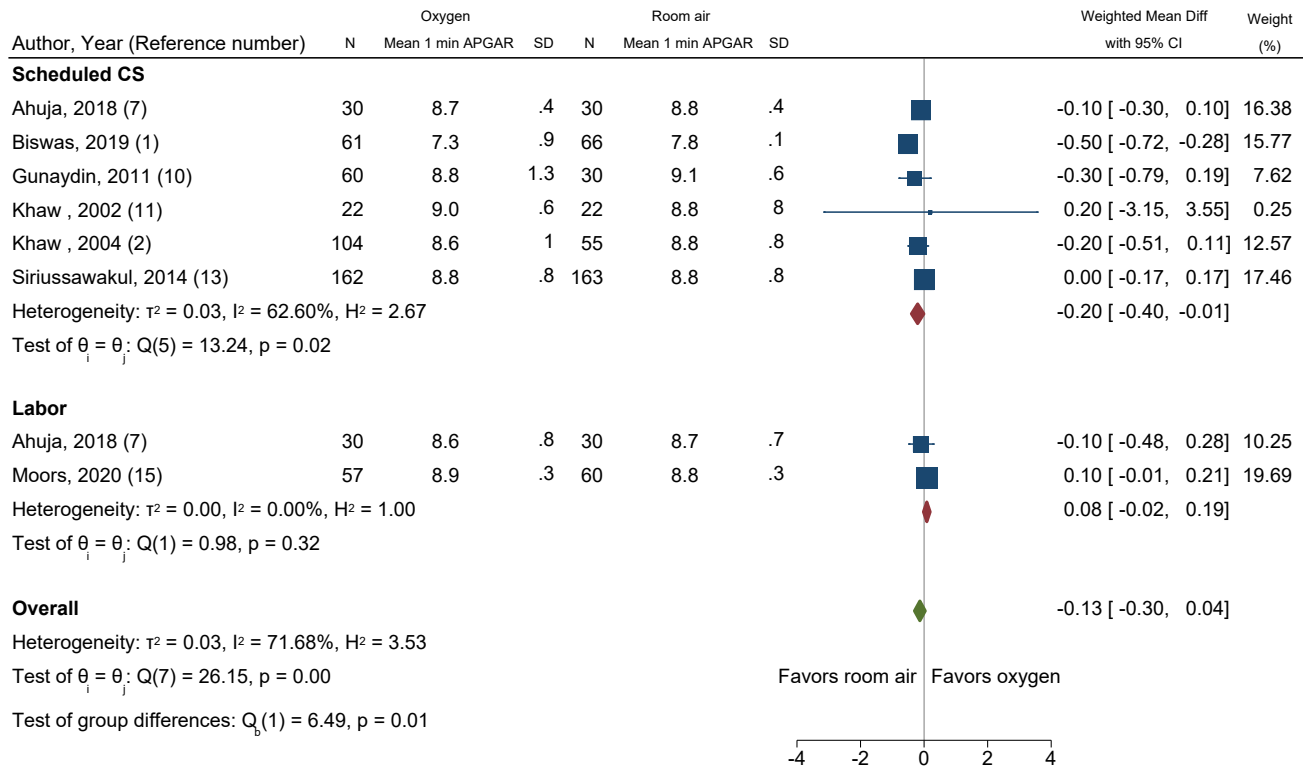

Random-effects REML model

eFigure 6: Forest Plot- Effect of maternal oxygen supplementation versus room air on 5 minute Apgar score

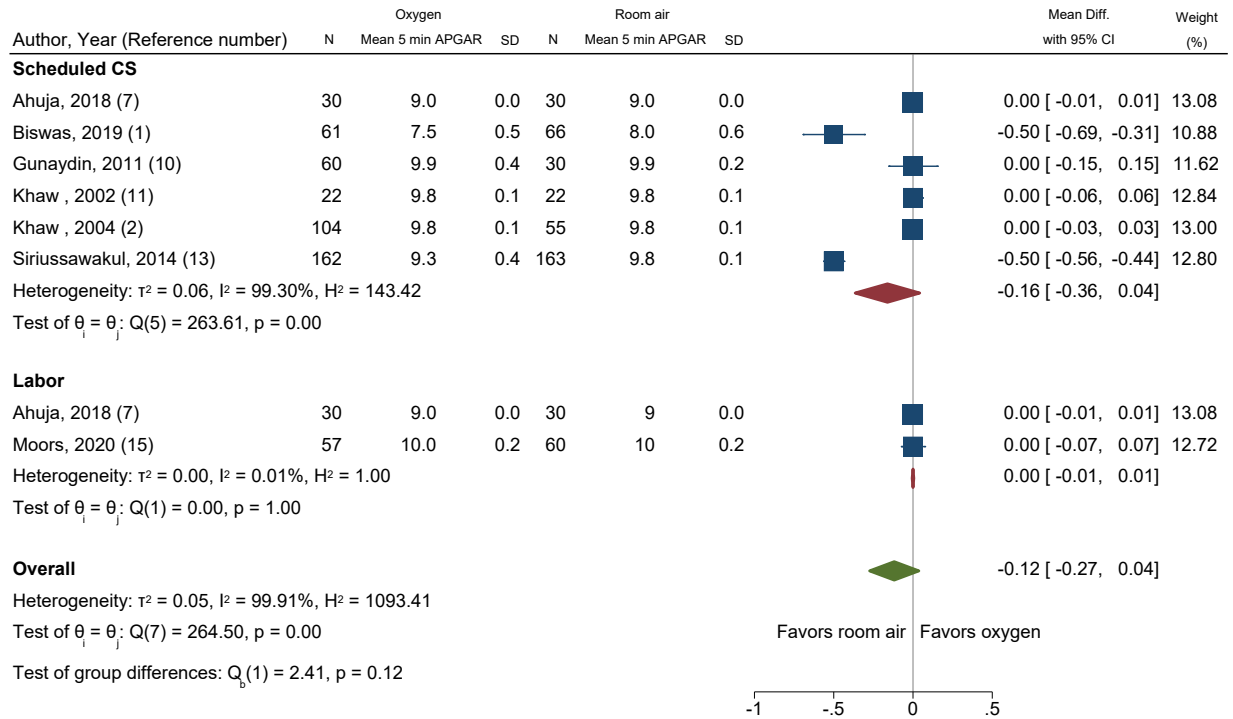

Random-effects REML model



eFigure 7: Forest plot- Effect of maternal oxygen supplementation versus room air on NICU admission

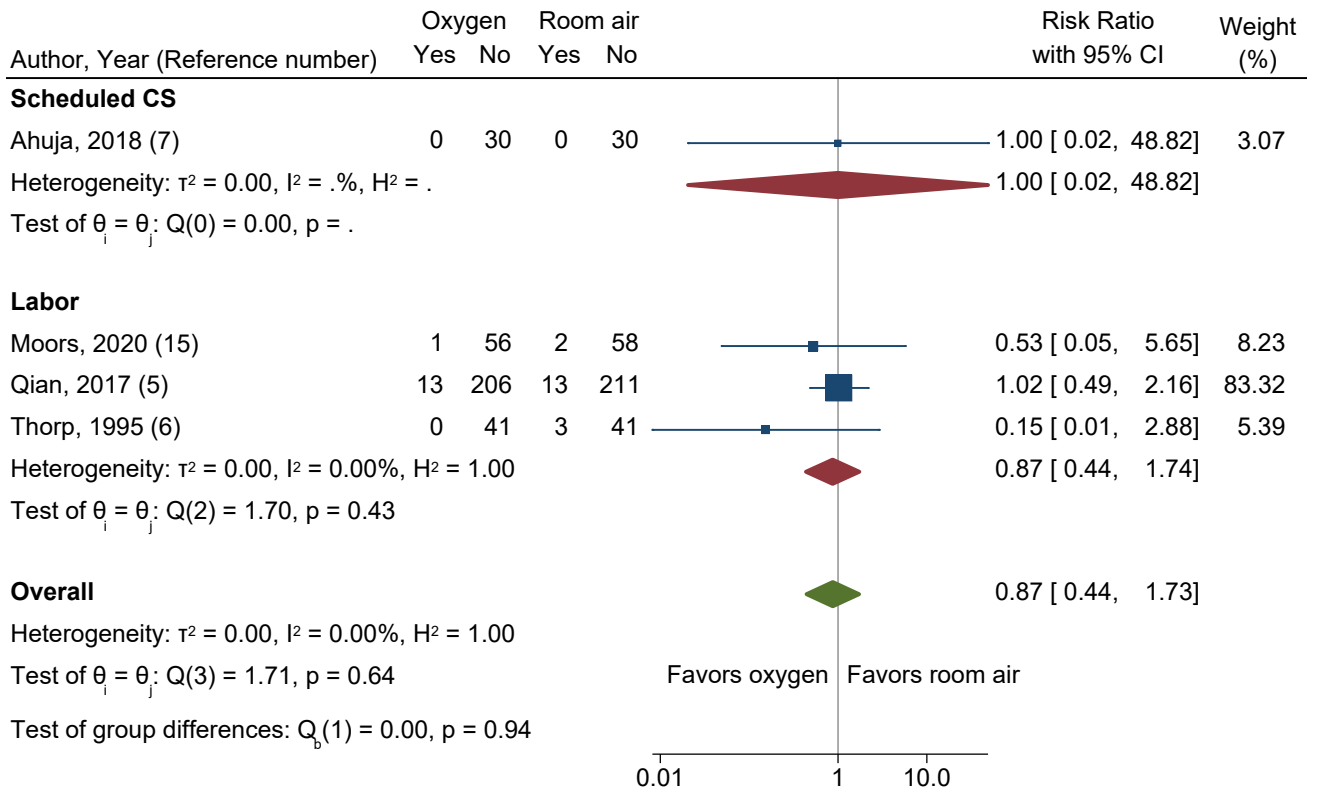

Random-effects REML model

## eAppendix. Search Syntax

### Ovid Medline

229 results

Exp obstetric Labor/ OR Exp obstetric delivery/ OR labor.mp. OR labour.mp. OR birth.mp. OR childbirth.mp. OR cesarean\*.mp. OR caesarean\*.mp. or cesarian.mp. OR caesarian.mp. OR c section.mp. OR c-section.mp. OR c-sections.mp. OR sectio caesarea.mp. OR cesarotomy.mp. OR fetectomy.mp. OR intrapartum.mp. OR ((delivery OR delivering OR delivered OR deliveries) AND (newborn\* OR fetus\* OR fetal OR mother\* OR matern\* OR obstetric\* OR neonat\* OR vagina\* or baby OR babies OR infant\* OR gestation\* OR pregnan\* OR perinat\* OR peripart\* OR preterm OR "full term")).mp.

AND

(Exp oxygen inhalation therapy/ OR Exp oxygen/th OR Exp oxygen/tu OR ((oxygen OR oxygenation OR hyperoxygenation OR o2) adj5 (therapy OR administration OR insufflation OR women OR woman OR maternal OR mother\*))).mp. )

AND

(Exp fetal blood/ OR Exp hydrogen-ion concentration/ OR Exp carbon dioxide/bl OR Exp bicarbonates/bl OR Exp oxygen/bl OR Exp blood gas analysis/ OR Acid-base imbalance/ OR Exp acidosis/ OR Alkalosis/ OR (hydrogen adj1 carbonate\*).mp. OR acidosis.mp. OR acidemia.mp. OR alkalosis.mp. OR carobonic acid ions.mp. OR acidemia.mp. OR acidaemia.mp. OR cooximetry.mp. OR hyperoxia.mp. OR hypoxia.mp. OR ((pH OR gas OR acid\* OR alkali OR lactate) adj3 (arterial OR umbilical OR cord OR funiculus)).mp. OR ((fetal OR fetus) adj3 (pH OR acid\* OR base)).mp. OR ((umbilicalis OR allantoic OR umbilical OR umbilicus) adj2 (vein OR arter\*).mp. OR ((blood\* OR plasma) adj1 (cord OR umbilical)).mp. OR (acid base).mp. OR plasma ph.mp. OR serum ph.mp. OR ((arter\* OR vein\* OR blood OR plasma OR serum) adj4 (lactate OR acid\* OR bas\* OR ph OR bicarbonate OR oxygen\* OR "carbon dioxide" OR co2 OR o2 OR pco2 OR p02)).mp. OR ((oxygen OR o2 OR po2) adj1 (affinity OR hemoglobin OR haemoglobin OR "binding capacity ")).mp.)

AND

((control adj3 group\*).mp. or ((patient or healthy or volunteer or volunteers) adj3 control\*).mp. or controlled clinical trial.pt. or randomized controlled trial.pt. or double-blind method/ or controlled clinical trials as topic/ or randomized controlled trials as topic/ or early termination of clinical trials as topic/ or (randomi?ed adj7 trial\*).mp. or (double-blind adj1 method).mp. or (controlled adj3 trial\*) or ((single or doubl\* or tripl\* or treb\*) and (blind\* or mask\*)).ti,ab,kw. or 4 arm.ti,ab,kw. or four arm.ti,ab,kw.)

### Embase

320 results

('oxygen therapy'/de OR (((oxygen OR oxygenation OR hyperoxygenation OR o2) NEAR/5 (therapy OR administration OR insufflation OR women OR woman OR maternal OR mother\*)):ti,ab,kw,de)) AND ('blood gas'/exp OR 'arterial ph'/exp OR 'blood ph'/exp OR

'umbilical artery'/exp OR 'blood gas analysis'/exp OR 'fetus acid base balance'/exp OR 'umbilical cord blood'/exp OR 'ph measurement'/exp OR 'disorders of acid base balance'/exp OR ((hydrogen NEAR/1 carbonate\*):ti,ab,kw,de) OR acidosis:ti,ab,kw,de OR alkalosis:ti,ab,kw,de OR 'carobonic acid ions':ti,ab,kw,de OR acidemia:ti,ab,kw,de OR acidaemia:ti,ab,kw,de OR cooximetry:ti,ab,kw,de OR hyperoxia:ti,ab,kw,de OR hypoxia:ti,ab,kw,de OR (((ph OR gas OR acid\* OR alkali OR lactate) NEAR/3 (arterial OR umbilical OR cord OR funiculus)):ti,ab,kw,de) OR (((fetal OR fetus) NEAR/3 (ph OR acid\* OR base)):ti,ab,kw,de) OR (((umbilicalis OR allantoic OR umbilical OR umbilicus) NEAR/2 (vein OR arter\*)):ti,ab,kw,de) OR (((blood\* OR plasma) NEAR/1 (cord OR umbilical)):ti,ab,kw,de) OR (acid:ti,ab,kw,de AND base:ti,ab,kw,de) OR 'plasma ph':ti,ab,kw,de OR 'serum ph':ti,ab,kw,de OR (((arter\* OR vein\* OR blood OR plasma OR serum) NEAR/4 (lactate OR acid\* OR bas\* OR ph OR bicarbonate OR oxygen\* OR 'carbon dioxide' OR co2 OR o2 OR pco2 OR p02)):ti,ab,kw,de) OR (((oxygen OR o2 OR po2) NEAR/1 (affinity OR hemoglobin OR haemoglobin OR 'binding capacity')):ti,ab,kw,de)) AND ((control NEAR/3 group\*) OR ((patient OR healthy OR volunteer OR volunteers) NEAR/3 control\*) OR 'controlled clinical trial' OR 'randomized controlled trial' OR 'double-blind method'/exp OR 'controlled clinical trials as topic'/exp OR 'randomized controlled trials as topic'/exp OR 'early termination of clinical trials as topic' OR (randomi?ed NEAR/7 trial\*) OR ('double blind' NEAR/1 method) OR (controlled NEAR/3 trial\*) OR ((single OR doubl\* OR tripl\* OR treb\*) AND (blind\* OR mask\*)) OR '4 arm' OR 'four arm') AND ((newborn\*:ti,ab,kw,de OR fetus\*:ti,ab,kw,de OR fetal:ti,ab,kw,de OR mother\*:ti,ab,kw,de OR matern\*:ti,ab,kw,de OR obstetric\*:ti,ab,kw,de OR neonat\*:ti,ab,kw,de OR vagina\*:ti,ab,kw,de OR baby:ti,ab,kw,de OR babies:ti,ab,kw,de OR infant\*:ti,ab,kw,de OR gestation\*:ti,ab,kw,de OR pregnan\*:ti,ab,kw,de OR perinat\*:ti,ab,kw,de OR peripart\*:ti,ab,kw,de OR preterm:ti,ab,kw,de OR 'full term':ti,ab,kw,de) AND (delivery:ti,ab,kw,de OR delivering:ti,ab,kw,de OR delivered:ti,ab,kw,de OR deliveries:ti,ab,kw,de) OR 'obstetric delivery'/exp OR 'obsetric delivery' OR 'instrumental delivery'/exp OR 'intrapartum care'/exp OR labor:ti,ab,kw,de OR labour:ti,ab,kw,de OR birth:ti,ab,kw,de OR childbirth:ti,ab,kw,de OR cesarean\*:ti,ab,kw,de OR caesarean\*:ti,ab,kw,de OR cesarian:ti,ab,kw,de OR caesarian:ti,ab,kw,de OR 'c section':ti,ab,kw,de OR 'c-section':ti,ab,kw,de OR 'c-sections':ti,ab,kw,de OR 'sectio caesarea':ti,ab,kw,de OR cesarotom\*:ti,ab,kw,de OR fetectom\*:ti,ab,kw,de OR intrapartum:ti,ab,kw,de)

## SCOPUS

297 results

(( ( TITLE-ABS-KEY ( labor ) ) OR ( TITLE-ABS-KEY ( labour ) ) OR ( TITLE-ABS-KEY ( birth ) ) OR ( TITLE-ABS-KEY ( childbirth ) ) OR ( TITLE-ABS-KEY ( cesarean\* ) ) OR ( TITLE-ABS-KEY ( caesarean\* ) ) OR ( TITLE-ABS-KEY ( cesarian ) ) OR ( TITLE-ABS-KEY ( caesarian ) ) OR ( TITLE-ABS-KEY ( "c section" ) ) OR ( TITLE-ABS-KEY ( "c-section" ) ) OR ( TITLE-ABS-KEY ( "c-sections" ) ) OR ( TITLE-ABS-KEY ( "sectio caesarea" ) ) OR ( TITLE-ABS-KEY ( cesarotom\* ) ) OR ( TITLE-ABS-KEY ( fetectom\* ) ) OR ( TITLE-ABS-KEY ( intrapartum ) ) ) OR ( ( ( TITLE-ABS-KEY ( delivery OR delivering OR delivered OR deliveries ) ) ) AND ( ( TITLE-ABS-KEY ( newborn\* OR fetus\* OR fetal OR mother\* OR matern\* OR obstetric\* OR neonat\* OR vagina\* OR

baby OR babies OR infant\* OR gestation\* OR pregnan\* OR perinat\* OR peripart\* OR preterm OR "full term" )))) AND (( TITLE-ABS-KEY (( oxygen OR oxygenation OR hyperoxygenation OR o2 ) W/5 ( therapy OR administration OR insufflation OR women OR woman OR maternal OR mother\* )))) AND (( TITLE-ABS-KEY ( hydrogen W/1 carbonate\* ) ) OR ( TITLE-ABS-KEY ( acidosis ) ) OR ( TITLE-ABS-KEY ( acidemia ) ) OR ( TITLE-ABS-KEY ( alkalosis ) ) OR ( TITLE-ABS-KEY ( "carobonic acid ions" ) ) OR ( TITLE-ABS-KEY ( acidemia ) ) OR ( TITLE-ABS-KEY ( acidaemia ) ) OR ( TITLE-ABS-KEY ( cooximetry ) ) OR ( TITLE-ABS-KEY ( hyperoxia ) ) OR ( TITLE-ABS-KEY ( hypoxia ) ) OR ( TITLE-ABS-KEY (( ph OR gas OR acid\* OR alkali OR lactate ) W/3 ( arterial OR umbilical OR cord OR funiculus ) ) ) OR ( TITLE-ABS-KEY (( fetal OR fetus ) W/3 ( ph OR acid\* OR base ) ) ) OR ( TITLE-ABS-KEY (( umbilicalis OR allantoic OR umbilical OR umbilicus ) W/2 ( vein OR arter\* ) ) ) OR ( TITLE-ABS-KEY (( blood\* OR plasma ) W/1 ( cord OR umbilical ) ) ) OR ( TITLE-ABS-KEY ( "acid base" ) ) OR ( TITLE-ABS-KEY ( "plasma ph" ) ) OR ( TITLE-ABS-KEY ( "serum ph" ) ) OR ( TITLE-ABS-KEY (( arter\* OR vein\* OR blood OR plasma OR serum ) W/4 ( lactate OR acid\* OR bas\* OR ph OR bicarbonate OR oxygen\* OR "carbon dioxide" OR co2 OR o2 OR pco2 OR p02 ) ) ) OR ( TITLE-ABS-KEY (( oxygen OR o2 OR po2 ) W/1 ( affinity OR hemoglobin OR haemoglobin OR "binding capacity" ) ) ) ) AND ((( TITLE-ABS-KEY ( control W/3 group\* ) ) OR ( TITLE-ABS-KEY (( patient OR healthy OR volunteer OR volunteers ) W/3 control\* ) ) OR ( TITLE-ABS-KEY ( randomi?ed W/7 trial\* ) ) OR ( TITLE-ABS-KEY ( double-blind W/1 method ) ) OR ( TITLE-ABS-KEY ( controlled W/3 trial\* ) ) OR ( TITLE-ABS-KEY (( single OR doubl\* OR tripl\* OR treb\* ) AND ( blind\* OR mask\* ) ) ) ) ) ) AND ( LIMIT-TO ( DOCTYPE , "ar" ) OR LIMIT-TO ( DOCTYPE , "re" ) )

## Cochrane Central

310 results

1. [mh "obstetric Labor"] OR [mh "obstetric delivery"] OR labor:ti,ab,kw OR labour:ti,ab,kw OR birth:ti,ab,kw OR childbirth:ti,ab,kw OR cesarean\*:ti,ab,kw OR caesarean\*:ti,ab,kw OR cesarian:ti,ab,kw OR caesarian:ti,ab,kw OR "c section":ti,ab,kw OR "c-section":ti,ab,kw OR "c-sections":ti,ab,kw OR "sectio caesarea":ti,ab,kw OR cesarotom\*:ti,ab,kw OR fetectom\*:ti,ab,kw OR intrapartum:ti,ab,kw OR ((delivery OR delivering OR delivered OR deliveries) AND (newborn\* OR fetus\* OR fetal OR mother\* OR matern\* OR obstetric\* OR neonat\* OR vagina\* OR baby OR babies OR infant\* OR gestation\* OR pregnan\* OR perinat\* OR peripart\* OR preterm OR "full term")):ti,ab,kw

2. [mh "oxygen inhalation therapy"] OR [mh oxygen/th] OR [mh oxygen/tu] OR ((oxygen OR oxygenation OR hyperoxygenation OR o2) near/5 (therapy OR administration OR insufflation OR women OR woman OR maternal OR mother\*)):ti,ab,kw

3. [mh "fetal blood"] OR [mh "hydrogen-ion concentration"] OR [mh "carbon dioxide"/bl] OR [mh bicarbonates/bl] OR [mh oxygen/bl] OR [mh "blood gas analysis"] OR [mh ^"Acid-base imbalance"] OR [mh acidosis] OR [mh ^Alkalosis] OR (hydrogen near/1 carbonate\*):ti,ab,kw

OR acidosis:ti,ab,kw OR acidemia:ti,ab,kw OR alkalosis:ti,ab,kw OR “carobonic acid ions”:ti,ab,kw OR acidemia:ti,ab,kw OR acidaemia:ti,ab,kw OR cooximetry:ti,ab,kw OR hyperoxia:ti,ab,kw OR hypoxia:ti,ab,kw OR ((pH OR gas OR acid\* OR alkali OR lactate) near/3 (arterial OR umbilical OR cord OR funiculus)):ti,ab,kw OR ((fetal OR fetus) near/3 (pH OR acid\* OR base)):ti,ab,kw OR ((umbilicalis OR allantoic OR umbilical OR umbilicus) near/2 (vein OR arter\*)):ti,ab,kw OR ((blood\* OR plasma) near/1 (cord OR umbilical)):ti,ab,kw OR “acid base”:ti,ab,kw OR “plasma ph”:ti,ab,kw OR “serum ph”:ti,ab,kw OR ((arter\* OR vein\* OR blood OR plasma or serum) near/4 (lactate OR acid\* OR bas\* OR ph OR bicarbonate OR oxygen\* OR “carbon dioxide” OR co2 OR o2 OR pco2 or p02)):ti,ab,kw OR ((oxygen OR o2 OR po2) near/1 (affinity OR hemoglobin OR haemoglobin OR “binding capacity “)):ti,ab,kw

4. ((control near/3 group\*) or ((patient or healthy or volunteer or volunteers) NEAR/3 control\*) or “controlled clinical trial” or “randomized controlled trial” or “double-blind method”/exp or “controlled clinical trials as topic”/exp or “randomized controlled trials as topic”/exp or “early termination of clinical trials as topic”/exp or (randomi?ed NEAR/7 trial\*) or (double-blind NEAR/1 method) or (controlled NEAR/3 trial\*) or ((single or doubl\* or tripl\* or treb\*) and (blind\* or mask\*)) or “4 arm” or “four arm”)

**5. #1 AND #2 AND #3 AND #4**

## eReferences

1. Biswas JC, Arpita : Das, Shyamashis : Mukhopadhyay, Purnava : Pal, Anirban : Jana, Dipan. Analysis of Neonatal Outcome with Supplemental Oxygen to Mother during Elective Cesarean Section under Spinal Anesthesia: A Prospective Randomized Controlled Trial. *Anesthesia, essays and researches*. 2019;13(3):577-582.
2. Khaw KSNK, W. D. : Lee, A. : Wang, C. C. : Wong, A. S. Y. : Ng, F. : Rogers, M. S. Supplementary oxygen for elective Caesarean section under spinal anaesthesia: useful in prolonged uterine incision-to-delivery interval? *British journal of anaesthesia*. 2004;92(4):518-522.
3. Simon VBF, Alex : Nageotte, Michael P. Supplementary Oxygen Study: A Randomized Controlled Study on the Effect of Maternal Oxygen Supplementation during Planned Cesarean Delivery on Umbilical Cord Gases. *American journal of perinatology*. 2018;35(1):84-89.
4. Khaw KSW, C. C. : Ngan Kee, W. D. : Tam, W. H. : Ng, F. F. : Critchley, L. A. H. : Rogers, M. S. Supplementary oxygen for emergency Caesarean section under regional anaesthesia. *British journal of anaesthesia*. 2009;102(1):90-96.
5. Qian GX, X. : Chen, L. : Xia, S. : Wang, A. : Chuai, Y. : Jiang, W. The effect of maternal low flow oxygen administration during the second stage of labour on umbilical cord artery pH: a randomised controlled trial. *BJOG : an international journal of obstetrics and gynaecology*. 2017;124(4):678-685.
6. Thorp JAT, T. : Evans, R. : Hedrick, J. : Yeast, J. D. The effect of maternal oxygen administration during the second stage of labor on umbilical cord blood gas values: a randomized controlled prospective trial. *American journal of obstetrics and gynecology*. 1995;172(2 Pt 1):465-474.
7. Ahuja VG, S. : Jaswal, S. : Kaur, J. : Gupta, P. : Chawla, D. : Huria, A. : Singh, S. Effect of maternal oxygen inhalation on foetal free radical activity: a prospective, randomized trial. *Acta anaesthesiologica Scandinavica*. 2018;62(1):26-37.
8. Castro CHVdC, Marcos Guilherme Cunha : Carneiro, Fabiano Soares : Silva, Yerkes Pereira : Cabral, Antonio Carlos Vieira : Bessa, Roberto Cardoso. [Correlation between the inspired fraction of oxygen, maternal partial oxygen pressure, and fetal partial oxygen pressure during cesarean section of normal pregnancies]. *Correlacao entre a fracao inspirada de oxigenio, a pressao parcial de oxigenio materno e a pressao parcial de oxigenio fetal durante parto cesareo em gestacoes normais*. 2009;59(4):452-460.
9. Cogliano MSG, A. C. : Clark, V. A. Supplementary oxygen administration for elective Caesarean section under spinal anaesthesia. *Anaesthesia*. 2002;57(1):66-69.
10. Gunaydin BN, Tuncay : Biri, Aydan : Koc, Esin : Koc, Ayfer : McCusker, Kevin. Effects of maternal supplementary oxygen on the newborn for elective cesarean deliveries under spinal anesthesia. *Journal of anesthesia*. 2011;25(3):363-368.
11. Khaw KSW, C. C. : Ngan Kee, W. D. : Pang, C. P. : Rogers, M. S. Effects of high inspired oxygen fraction during elective caesarean section under spinal anaesthesia on maternal and fetal oxygenation and lipid peroxidation. *British journal of anaesthesia*. 2002;88(1):18-23.
12. Ramanathan S, Gandhi S, Arismendy J, Chalon J, Turndorf H. Oxygen transfer from mother to fetus during cesarean section under epidural anesthesia. *Anesth Analg*. Jul 1982;61(7):576-581.
13. Siriussawakul AT, Namtip : Nimmannit, Akarin : Ngermcham, Sopapan : Hirunkanokpan, Promphon : Luang-Aram, Sasiwalai : Pechpaisit, Nusaroch : Wangdee, Aungsumat :

- Ruangvutilert, Pornpimol. Effects of supplemental oxygen on maternal and neonatal oxygenation in elective cesarean section under spinal anesthesia: a randomized controlled trial. *BioMed research international*. 2014;2014:627028.
14. Palacio FO-G, J. R. : Fornet, I. : Morillas, P. : Bermejo, L. : Lopez, A. [Is oxygen therapy truly useful and necessary during elective cesarean section under spinal anesthesia?]. *Es realmente necesaria y util la oxigenoterapia suplementaria en la cesarea programada bajo anestesia subaracnoidea?* 2008;55(10):597-604.
  15. Moors S BL, Van Runnard Heimel PJ, Dieleman JP, Kulik W, Bakkeren DL, Van Den Heuvel ER, Van Der Hout- Van Der Jagt MB, Oei SG. The effect of intrauterine resuscitation by maternal hyperoxygenation on perinatal and maternal outcome; a randomized controlled trial. *American Journal of Obstetrics & Gynecology MFM* 2020.
  16. Raghuraman NW, Leping : Temming, Lorene A. : Woolfolk, Candice : Macones, George A. : Tuuli, Methodius G. : Cahill, Alison G. Effect of Oxygen vs Room Air on Intrauterine Fetal Resuscitation: A Randomized Noninferiority Clinical Trial. *JAMA pediatrics*. 2018;172(9):818-823.
